# Supplementary material for: Global identification of dominant ice-particle growth in cirrus clouds using EarthCARE satellite observations
Source: Copernicus journal article supplement (doi:10.5194/egusphere-2025-4819), 2025-10-09

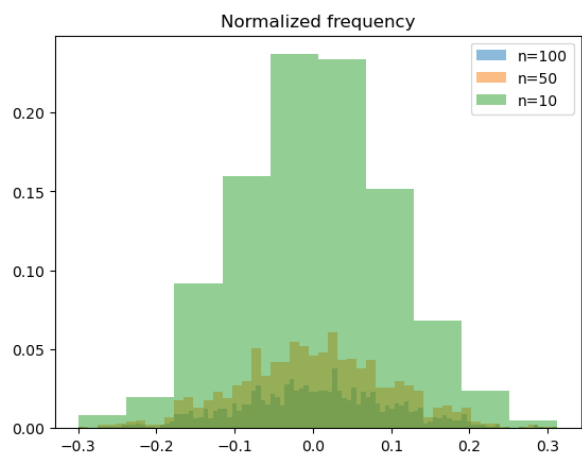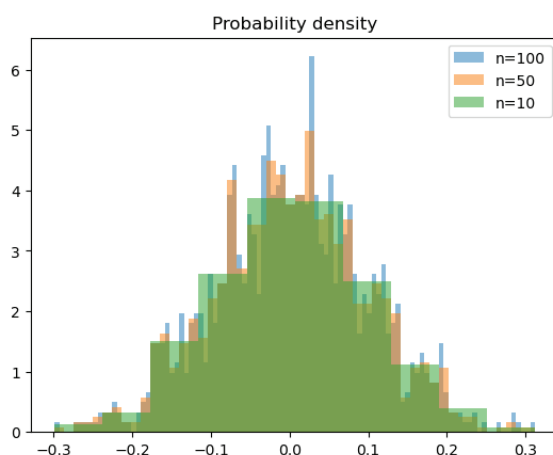

Supplement: Supplementary file [file egusphere-2025-4819-RC1-supplement.pdf]
